# Supplementary material for: Dynamic disulfide bonds facilitated fabrication of a multifunctional liquid-free elastomer for recyclable soft electronics
Source: Royal Society of Chemistry journal article supplement (doi:10.1039/d3tc03159d), 2023-01-01
Supplement: d3tc03159d1.pdf [file d3tc03159d1.pdf]

## Supporting information

# Dynamic Disulfide Bonds Fabricated Multifunctional Liquid-free Elastomer for Recyclable Soft Electronics

*Cheng Xu<sup>a,b</sup>, Yong Sun<sup>b,c</sup>, Zhiming Zhu<sup>a</sup>, Junji Zhang<sup>\*,a</sup> and Wei Xu<sup>\*,b,c</sup>*

<sup>a</sup> Key Laboratory for Advanced Materials and Joint International Research, Laboratory of Precision Chemistry and Molecular Engineering, Feringa Nobel Prize Scientist Joint Research Center, School of Chemistry and Molecular Engineering, Frontiers Center for Materiobiology and Dynamic Chemistry, East China University of Science and Technology, Shanghai 200237, China

<sup>b</sup> Beijing National Laboratory for Molecular Sciences, Key Laboratory of Organic Solids, Institute of Chemistry, Chinese Academy of Sciences, Beijing 100190, China

<sup>c</sup> University of Chinese Academy of Sciences, Beijing 100049, China

**Content:**

**Figure S1.**  $^1\text{H}$ NMR spectrum of TA monomer and **PTAIM**. The peak at 2.8 ppm in **PTAIM** indicates the formation of the linear polymer through the ROP process of TA monomer.

**Figure S2.** SEM images of **PTAIM** with the ratio of 1:0.2:0.4:0.1.

**Figure S3.** SEM mapping images of **PTAIM** (green: Cl element, blue: N element, purple: S element).

**Figure S4.** TGA of **PTAIM** with the ratio of TA:IA:[VBIM][Cl]:[BMIM][Cl] = 1:0.2:0.4:0.1.

**Figure S5.** Strain-stress curves of **PTAIM** with different ratios of TA to IA, the ratio of TA to [VBIM][Cl] is 1:0.4.

**Table S1** The mechanical performance of **PTAIM** with different content of [VEIM][Cl]. The ratio of IA to TA is fixed at 0.2:1.

**Figure S6.** Successive compression curves of **PTAIM** at the strain of 60% for 5 times.

**Figure S7.** The degradation process of ICE in 0.5 M NaOH solution.

**Figure S8.** The tensile stress curves (A) and conductivity (B) of **PTAIM** before and after remolding for 3 and 5 cycles.

**Figure S9.** Relative resistance changes of **PTAIM** as the function of strain after remolding for 3 times.

**Figure S10.** The photo of a 5×5 **PTAIM** pressure sensor array.

**Figure S11.** Comparison of **PTAIM** with the reported ICEs.

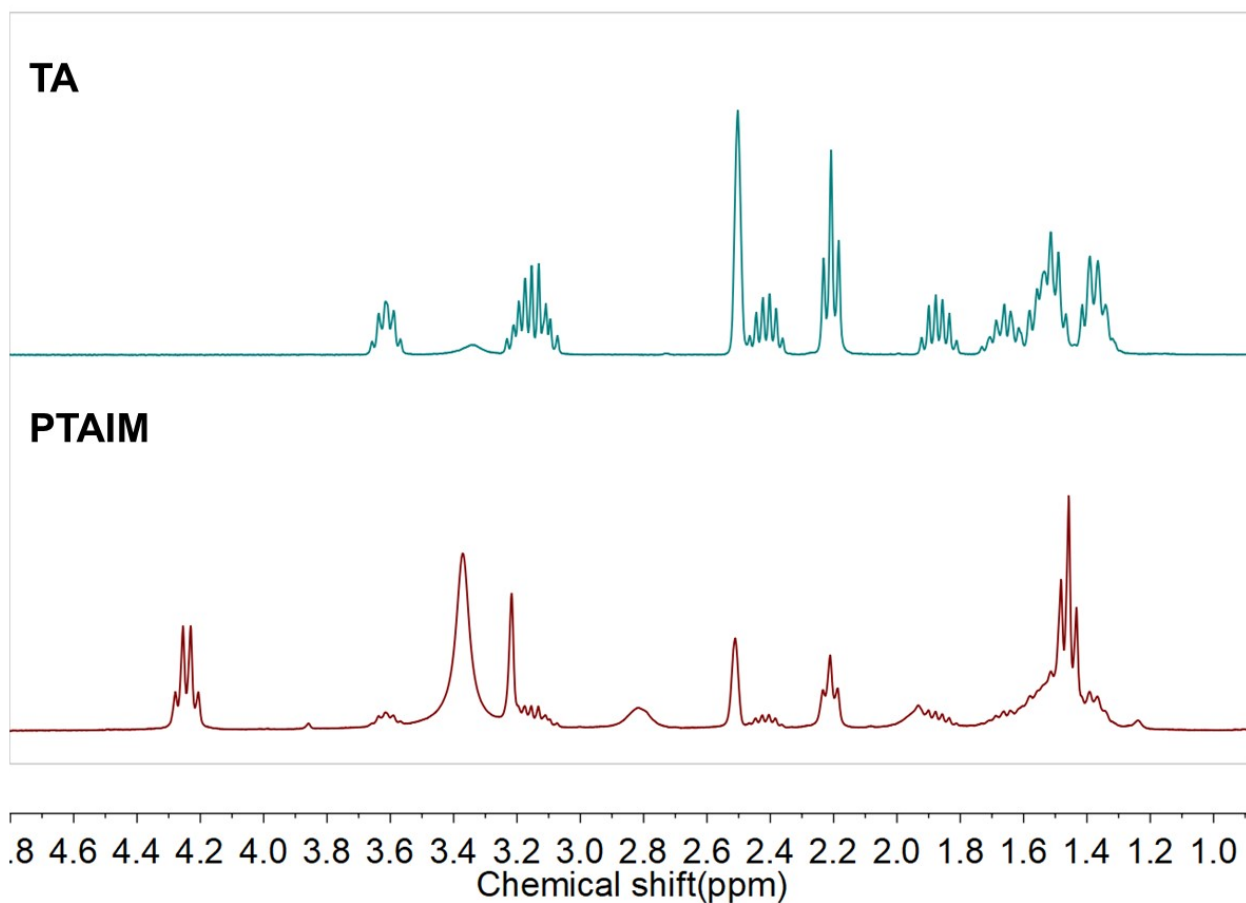

**Figure S1.** <sup>1</sup>H NMR spectrum of TA monomer and **PTAIM**. The peak at 2.8 ppm in **PTAIM** indicates the formation of the linear polymer through the ROP process of TA monomer.

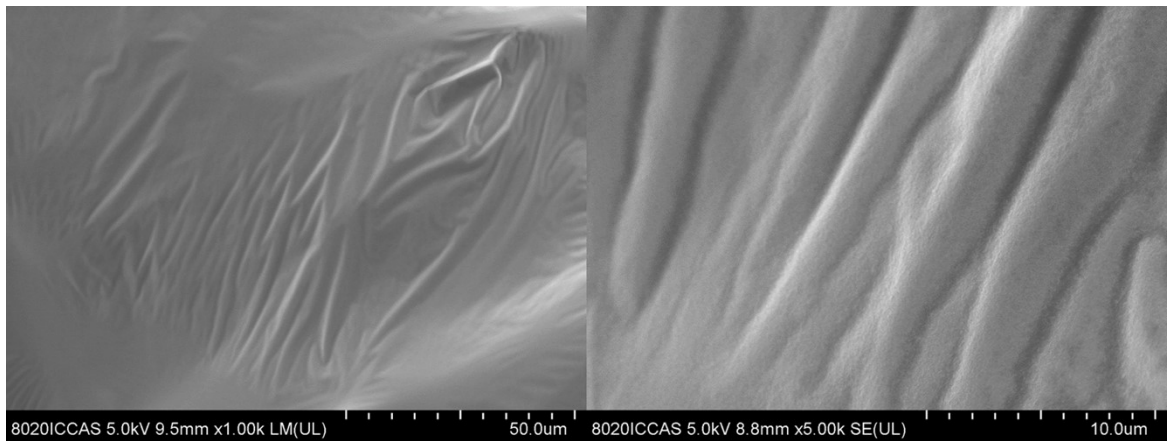

**Figure S2.** SEM images of **PTAIM** with the ratio of 1:0.2:0.4:0.1.

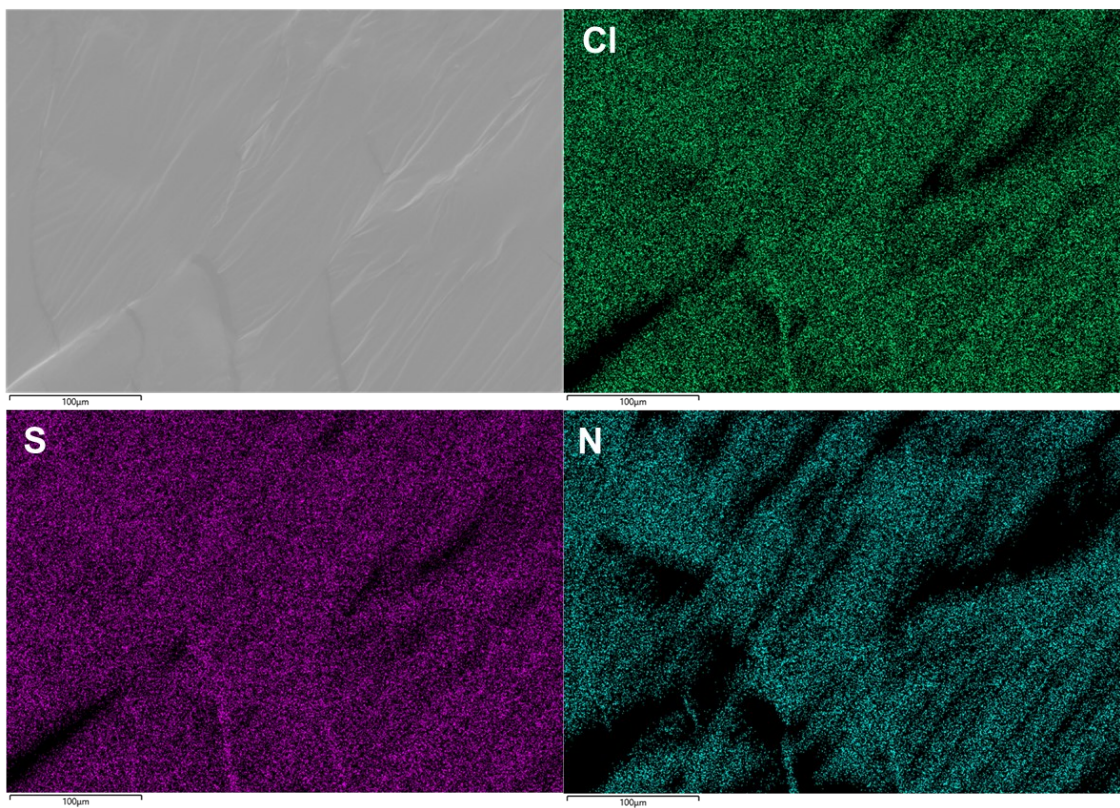

**Figure S3.** SEM mapping images of **PTAIM** (green: Cl element, blue: N element, purple: S element).

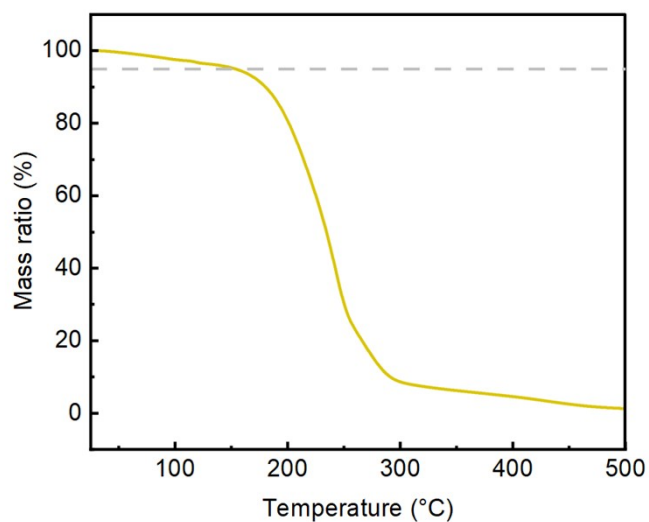

**Figure S4.** TGA of **PTAIM** with the ratio of TA:IA:[VBIM][Cl]:[BMIM][Cl] = 1:0.2:0.4:0.1.

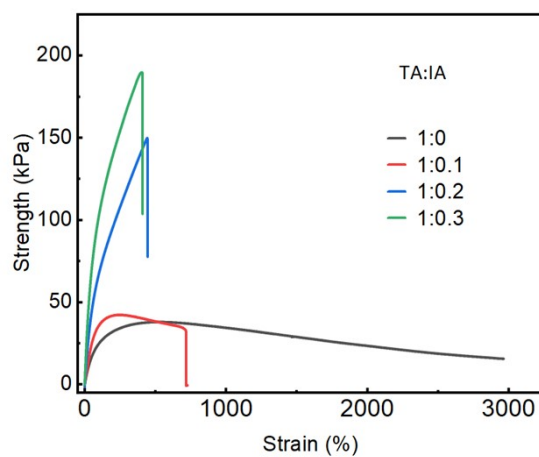

**Figure S5.** Strain-stress curves of **PTAIM** with different ratios of TA to IA, the ratio of TA to [VBIM][Cl] is 1:0.4.

**Table S1** The mechanical performance of PTAIM with different content of [VEIM][Cl].

The ratio of IA to TA is fixed at 0.2:1.

| Ratio | Young's modulus<br>(kPa) | Break strain (%) | Break stress<br>(kPa) |
|-------|--------------------------|------------------|-----------------------|
| 1:0   | 486                      | >3000            | N/A                   |
| 1:0.1 | 532                      | 714              | 33                    |
| 1:0.2 | 1159                     | 440              | 149                   |
| 1:0.3 | 2520                     | 405              | 189                   |

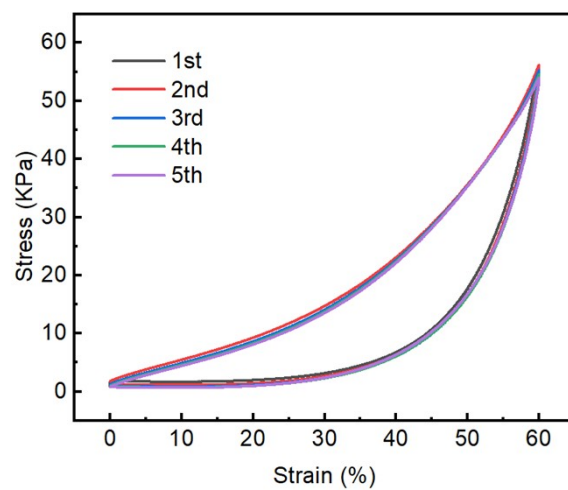

**Figure S6.** Successive compression curves of **PTAIM** at the strain of 60% for 5 times.

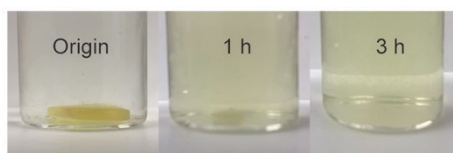

**Figure S7.** The degradation process of ICE in 0.5 M NaOH solution.

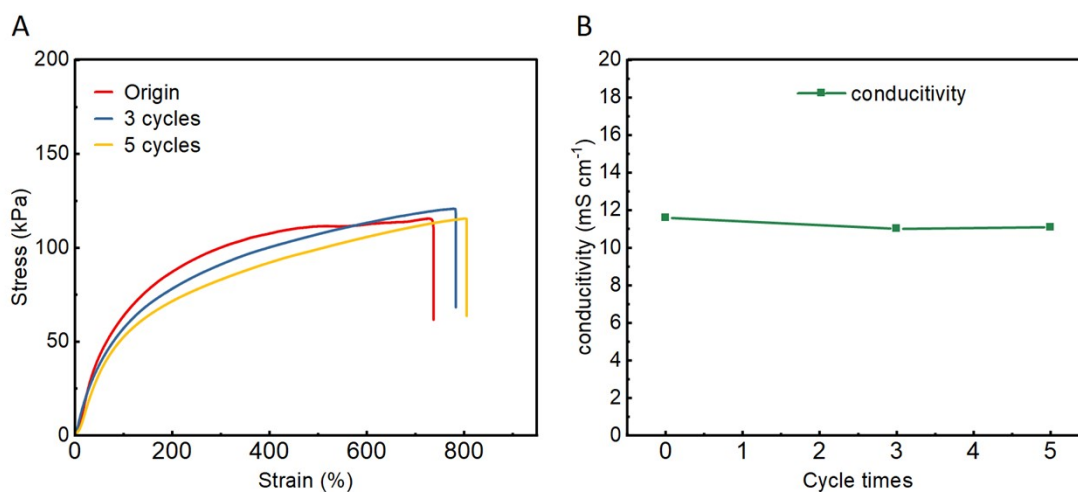

**Figure S8.** The tensile stress curves (A) and conductivity (B) of **PTAIM** before and after remolding for 3 and 5 cycles.

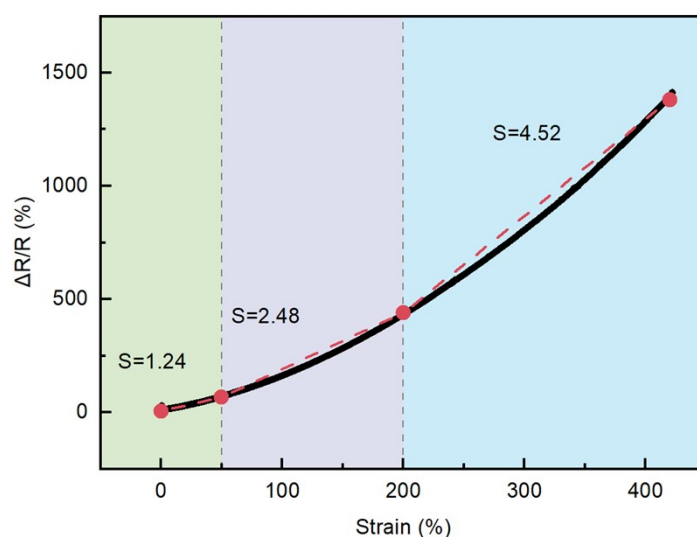

**Figure S9.** Relative resistance changes of **PTAIM** as the function of strain after remolding for 3 times.



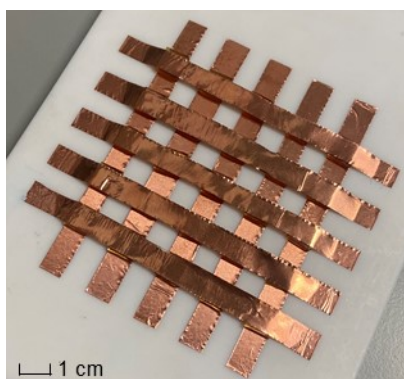

**Figure S10.** The photo of a 5×5 **PTAIM** pressure sensor array.

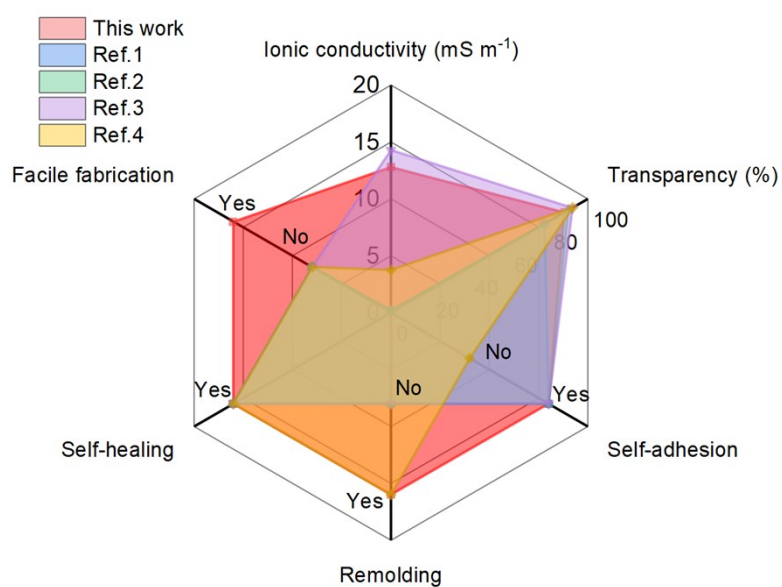

**Figure S11.** Comparison of **PTAIM** with the reported ICEs<sup>1-4</sup>.

## References

1. P. Zhang, W. Guo, Z. H. Guo, Y. Ma, L. Gao, Z. Cong, X. J. Zhao, L. Qiao, X. Pu and Z. L. Wang, *Adv. Mater.*, 2021, **33**, e2101396.
2. B. Yiming, Y. Han, Z. Han, X. Zhang, Y. Li, W. Lian, M. Zhang, J. Yin, T. Sun, Z. Wu, T. Li, J. Fu, Z. Jia and S. Qu, *Adv. Mater.*, 2021, **33**, e2006111.
3. P. Ding, K. Zhao, R. a. Li, P. Sang, X. Liang, K. Zhang, X. Liu, G. Chen and M. He, *Chem. Mater.*, 2022, **34**, 10320-10328.
4. J. Chen, Y. Gao, L. Shi, W. Yu, Z. Sun, Y. Zhou, S. Liu, H. Mao, D. Zhang, T. Lu, Q. Chen, D. Yu and S. Ding, *Nat. Commun.*, 2022, **13**, 4868.
